# Supplementary material for: Role of iron oxidation byproducts in the removal of phosphate from aqueous solution
Source: Royal Society of Chemistry journal article supplement (doi:10.1039/c5ra22444f), 2015-12-16
Supplement: c5ra22444f1.pdf [file c5ra22444f1.pdf]

### Supplementary information 1

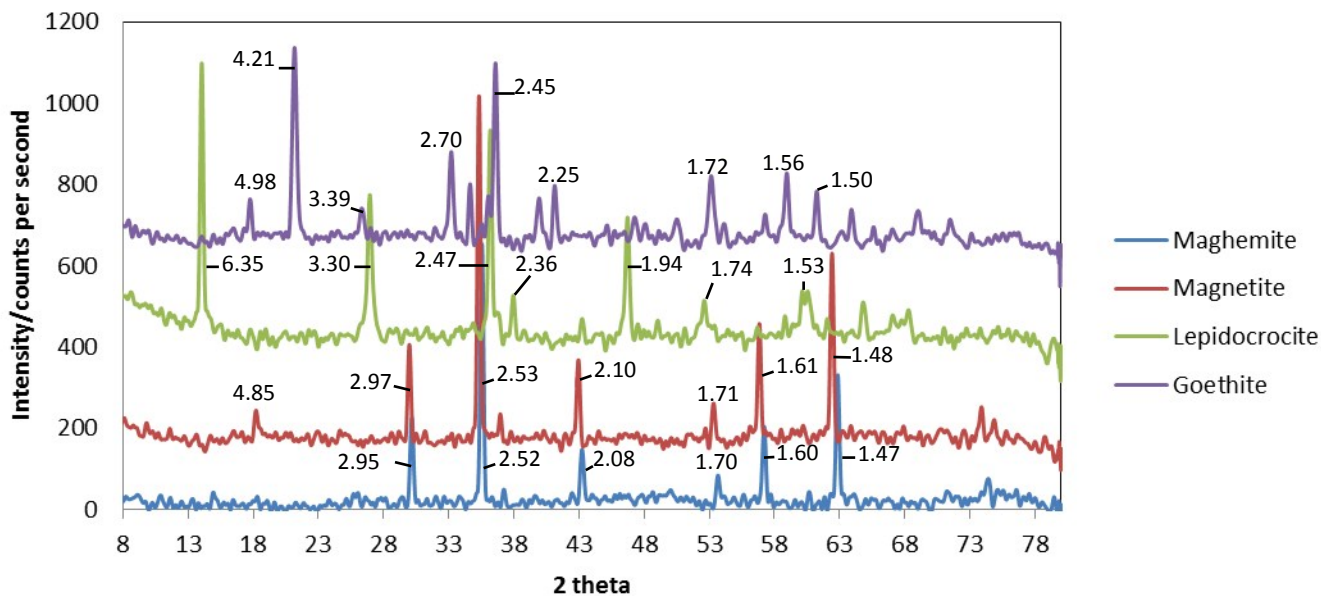

**Fig. S1** XRD patterns for the synthetic iron oxides (Maghemite and Magnetite) and oxy-hydroxides (Lepidocrocite and Goethite). The specific peaks of each sample are indexed using d-spacing scale [Å].

## Supplementary information 2

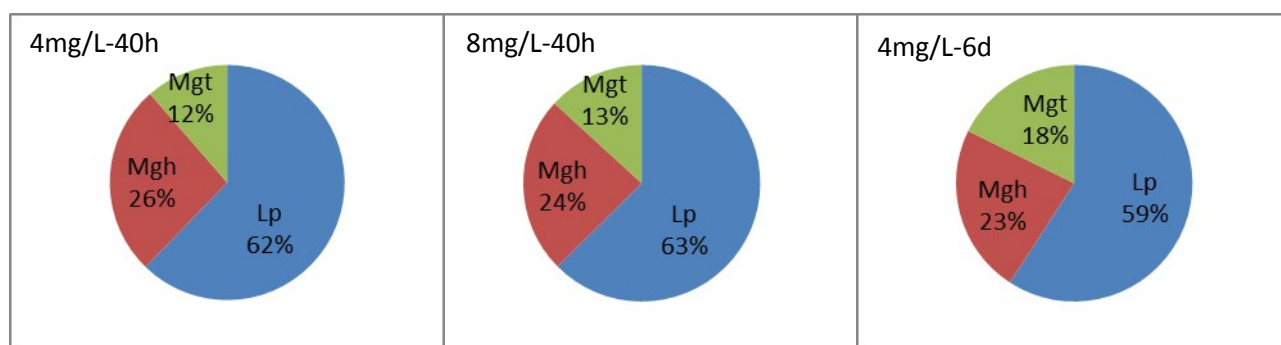

**Fig. S2** Semi-quantitative XRD simulation of different oxides and oxy-hydroxides in the synthesized samples. Legend: Lp for lepidocrocite, Mgh for maghemite and Mgt for magnetite.
